# Supplementary material for: Constructing an inorganic-rich solid electrolyte interphase by adjusting electrolyte additives for stable Li metal anodes
Source: Royal Society of Chemistry journal article supplement (doi:10.1039/d3ta07655e), 2024-01-01
Supplement: d3ta07655e1.pdf [file d3ta07655e1.pdf]

## **Constructing Inorganic-Rich Solid Electrolyte Interphase via Adjusting Electrolyte Additives for Stable Li Metal Anodes**

Minghui Li<sup>a</sup>, Cai Chen<sup>a</sup>, Hongze Luo<sup>b</sup>, Qingshuai Xu<sup>a, \*</sup>, Keyou Yan<sup>a, \*</sup>, Yongcai Qiu<sup>a, \*</sup>  
Guangmin Zhou<sup>c</sup>

<sup>a</sup>School of Environment and Energy, State Key Laboratory of Luminescent Materials and Devices, South China University of Technology, Guangzhou, China

<sup>b</sup>Energy Centre, Council for Scientific and Industrial Research (CSIR), P O Box 395, Pretoria, 0001, South Africa.

<sup>c</sup>Tsinghua-Berkeley Shenzhen Institute & Tsinghua Shenzhen International Graduate School, Tsinghua University, Shenzhen, 518055 P. R. China

\*Corresponding Author E-mail: 202010108155@mail.scut.edu.cn

kyyan@scut.edu.cn, ycqiu@scut.edu.cn

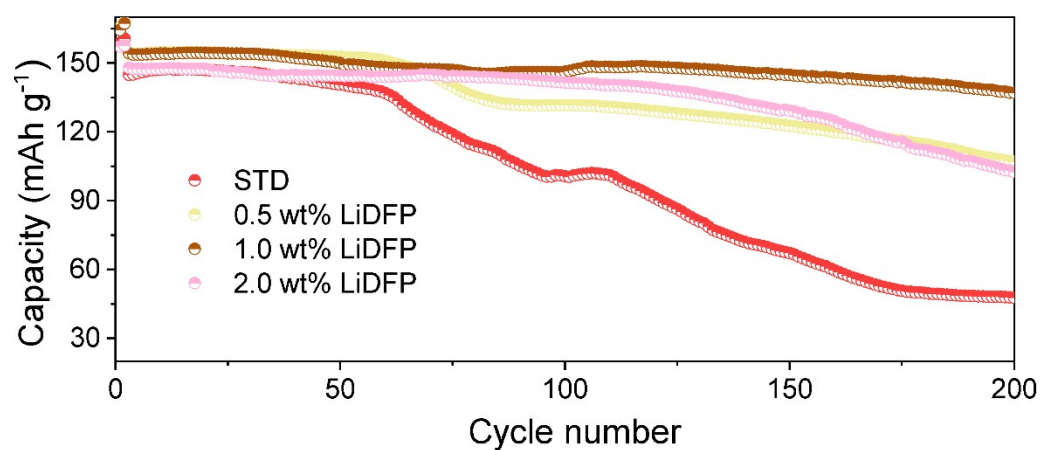

Fig. S1. The performance of the Li||LFP full cells in different concentrations (0–2.0 wt%) with LiDFP.

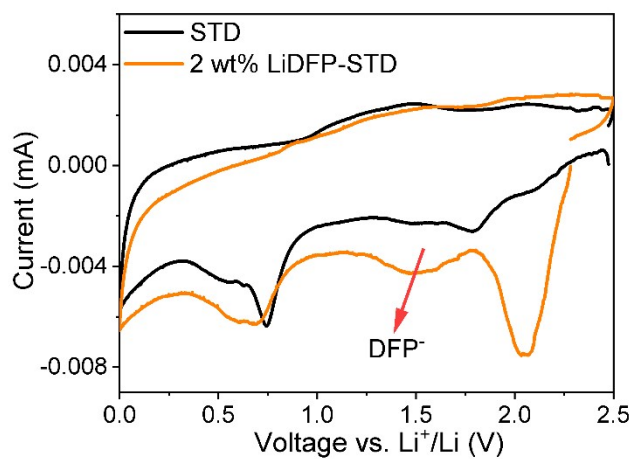

Fig. S2. CV curves of Li||Cu half cells between a voltage range of 0–2.5 V at a scan rate of  $0.2 \text{ mV s}^{-1}$ . Comparison of LiDFP reduction peak in LiDFP-STD (orange line) and STD (black line) electrolytes.

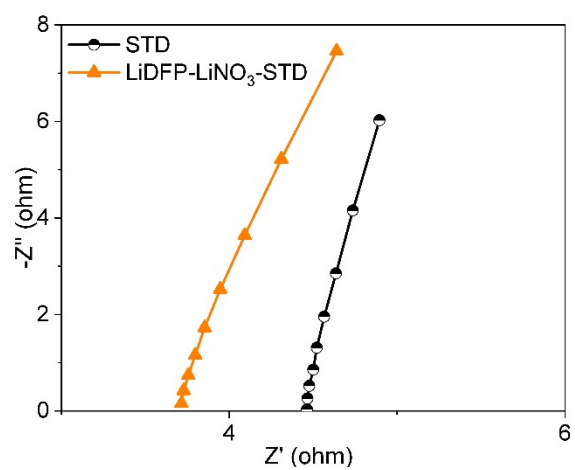

Fig. S3. EIS of the SS||SS symmetric cells with STD and LiDFP-LiNO<sub>3</sub>-STD.

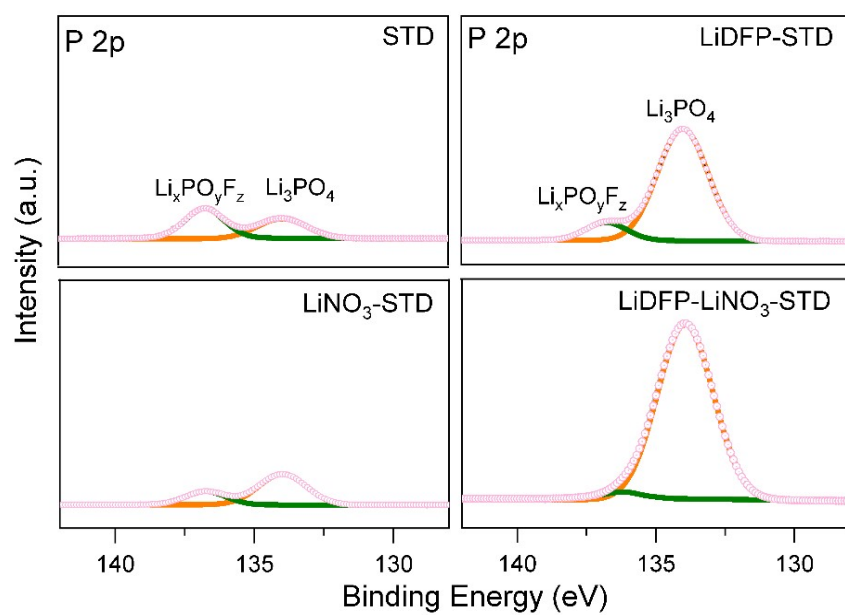

Fig. S4. P 2p XPS spectra on Li metal surfaces in various electrolytes.

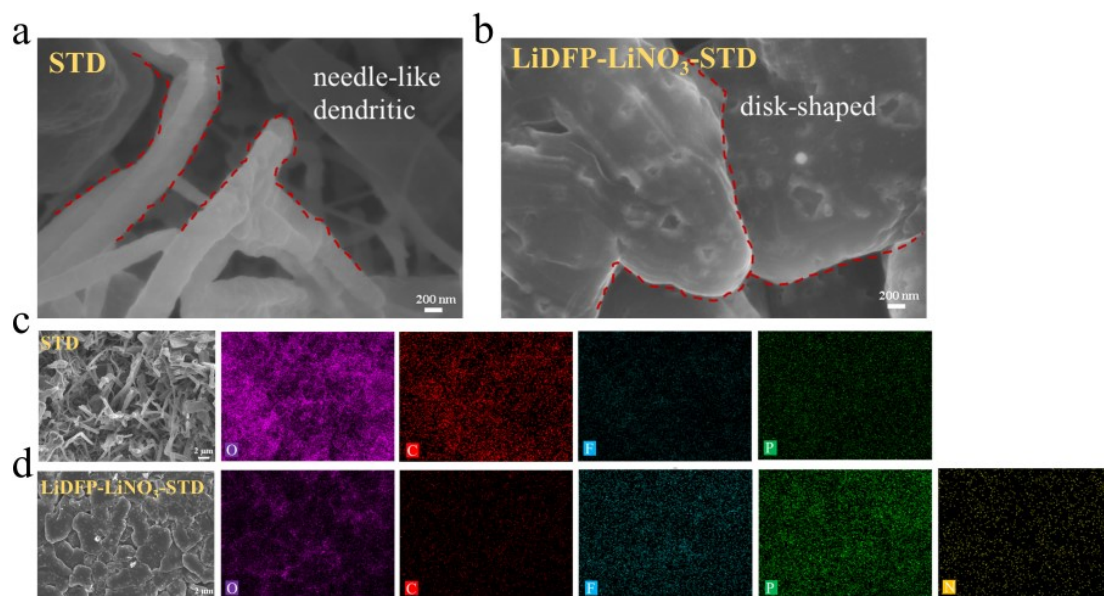

Fig. S5. SEM images of the electrodeposited Li at  $0.5 \text{ mA cm}^{-2}$  with fixed  $5.0 \text{ mAh cm}^{-2}$  on Cu foils with (a)STD and (b)LiDFP-LiNO<sub>3</sub>-STD at 20000x magnification, (c)STD, (d)LiDFP-LiNO<sub>3</sub>-STD at 3000x magnification and the corresponding mapping images, respectively.

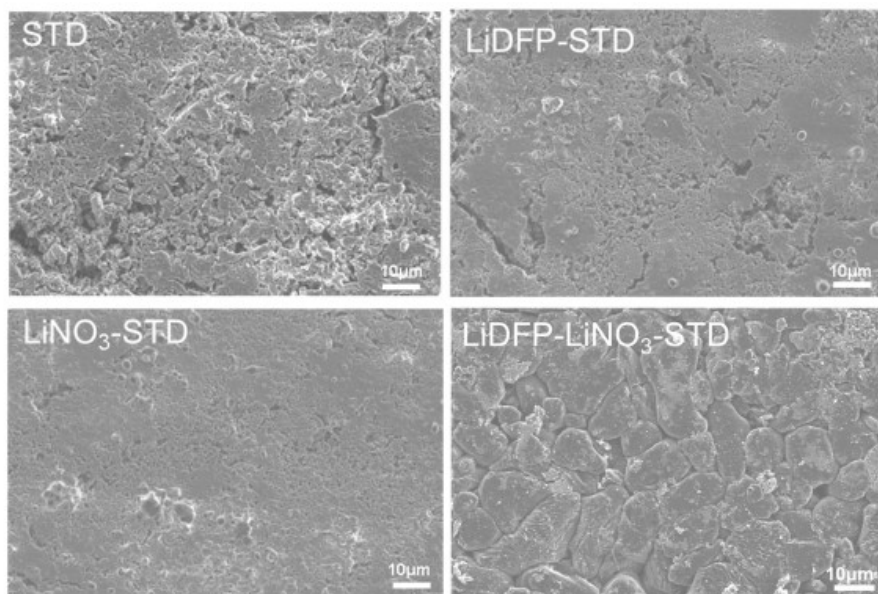

Fig. S6. SEM images top views of the Li metal anode of Li||Li cells after 120 cycles at 1.0 mA cm<sup>-2</sup> with fixed 1.0 mAh cm<sup>-2</sup>.

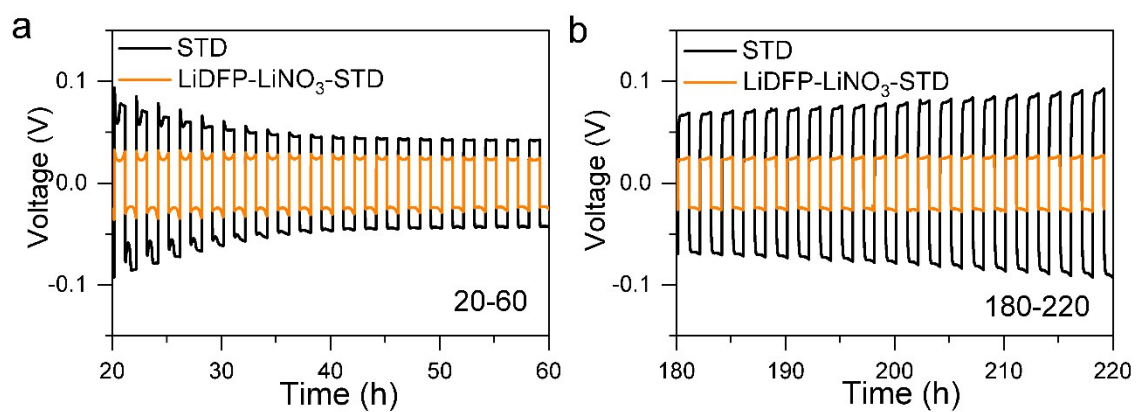

Fig. S7. Detailed analysis of Li||Li cells voltage profiles at a current density of  $1.0 \text{ mA cm}^{-2}$  with a capacity of  $1.0 \text{ mAh cm}^{-2}$  in STD and LiDFP-LiNO<sub>3</sub>-STD.

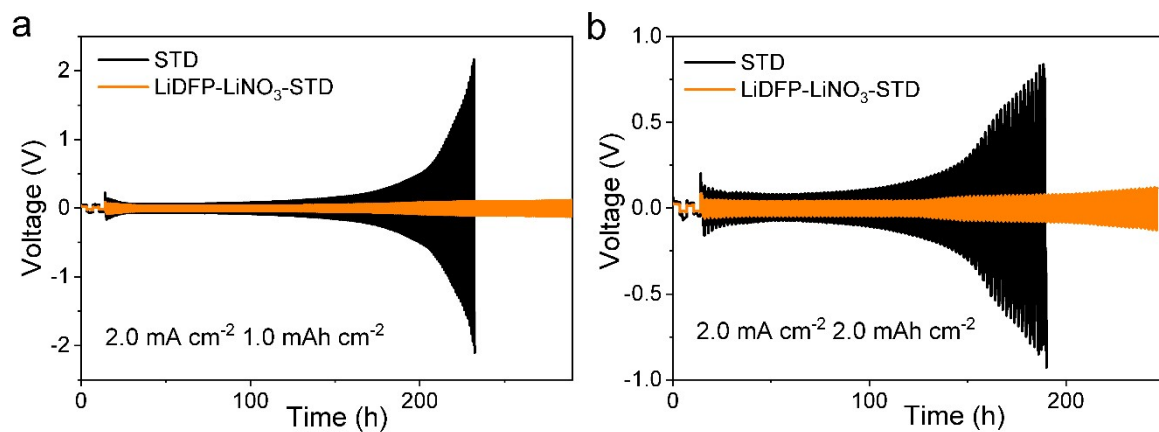

Fig. S8. Cycling performance of the Li||Li symmetric cells at a current density of 2.0 mA cm<sup>-2</sup> with a fixed capacity of 1.0 mAh cm<sup>-2</sup> (a) and a fixed capacity of 2.0 mAh cm<sup>-2</sup> (b) in various electrolytes.

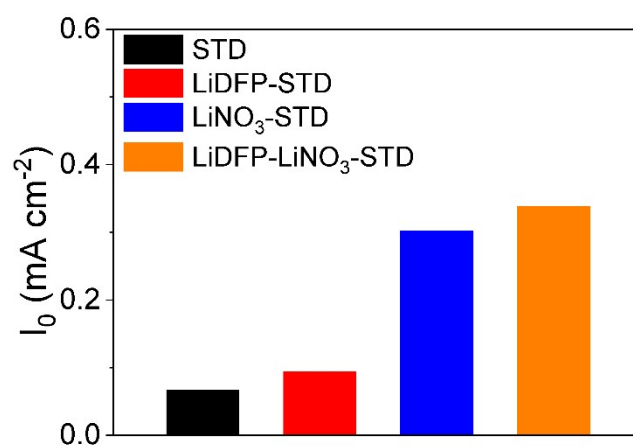

Fig. S9. Exchange current densities ( $I_0$ ) values fitted of various electrolytes according to Fig. 3d.

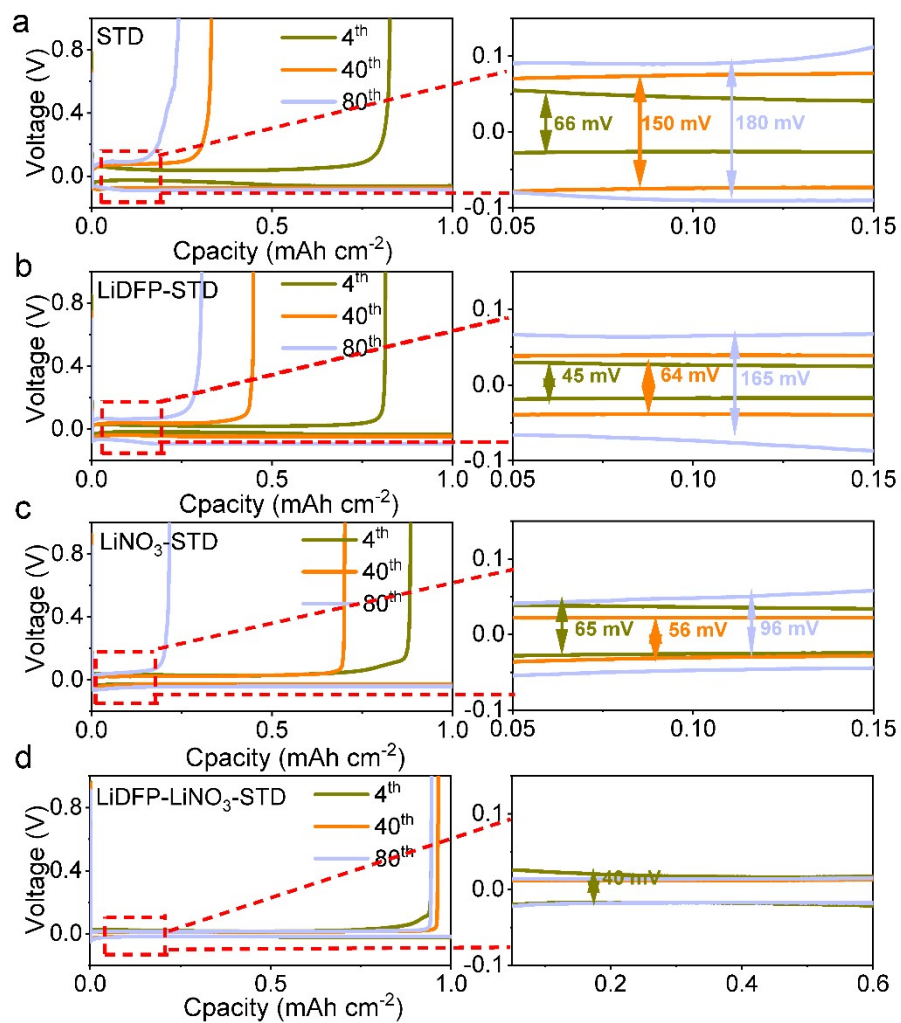

Fig. S10. Li metal deposition/stripping voltage profiles at 4th, 40th, and 80th in various electrolytes.

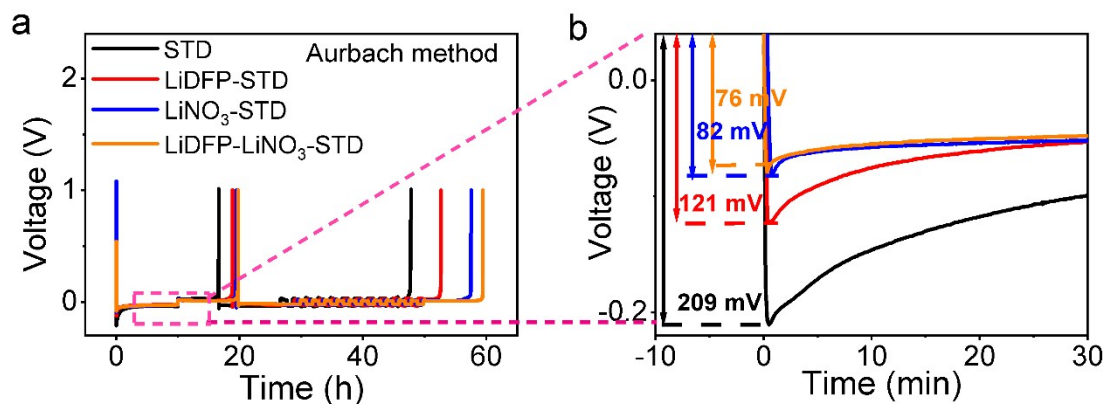

Fig. S11. (a) Coulombic efficiency of Li plating/stripping in different electrolytes by using the Aurbach method. (b) Magnified view of the Li nucleation potential in various electrolytes.

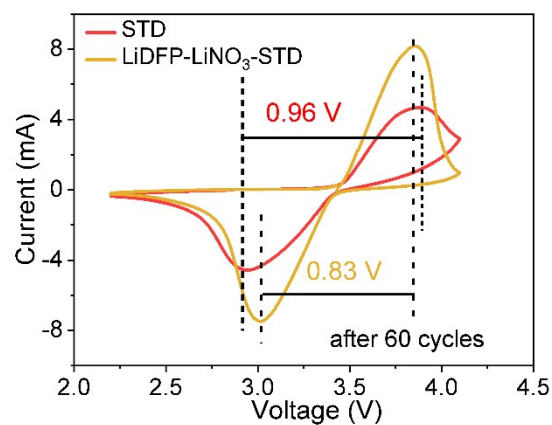

Fig. S12. Cyclic voltammetry of the Li||LFP cells in the voltage range of 2.2–4.1 V with a scanning speed of  $0.2 \text{ mV s}^{-1}$ .

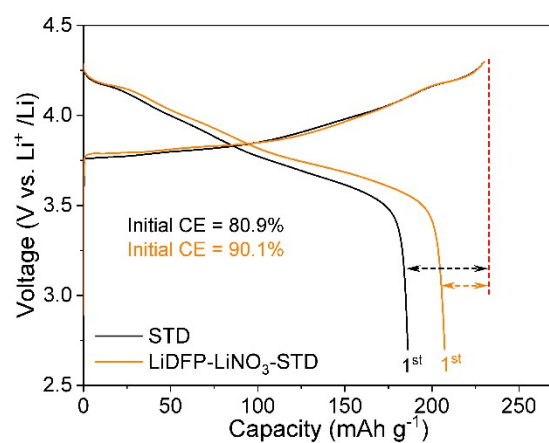

Fig. S13. The first cycle of charge-discharge curve and initial CE values of Li||NCM811 full cells in different electrolytes.

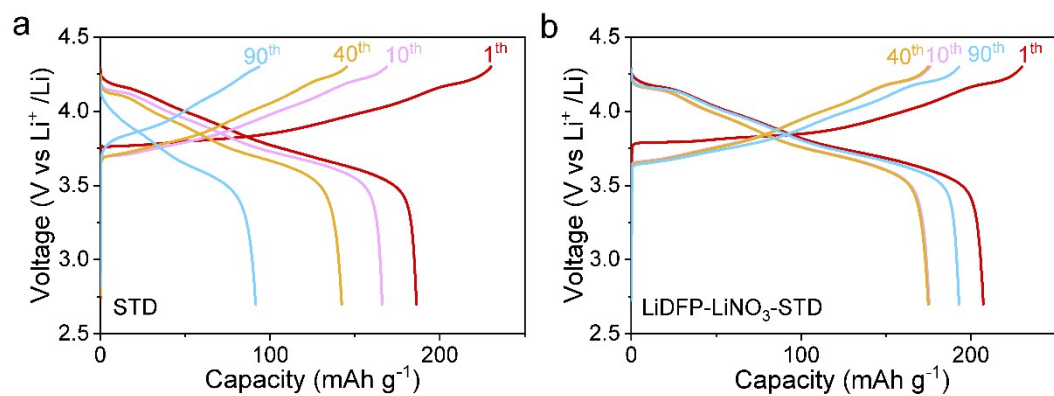

Fig. S14. Charge-discharge profiles of Li||NCM811 full cells assembled with STD electrolyte (a) and LiDFP- $\text{LiNO}_3$ -STD-electrolyte (b) at 1th, 10th, 40th, 90th cycle.

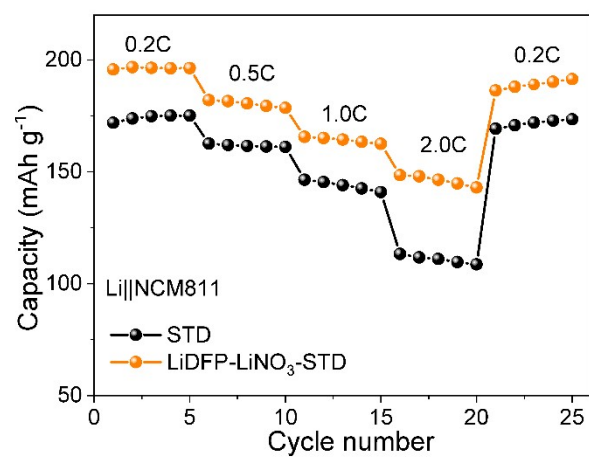

Fig. S15. Rate performance of the Li||NCM811 cells cycled between 2.7–4.3 V at various C-rates from 0.2 C to 2.0 C.
